# Supplementary material for: Outcomes reported on the management of COPD exacerbations: a systematic survey of randomised controlled trials
Source: PubMed Central journal article supplement — ERJ Open Res. 2019 May 10;5(2):00072-2019. doi: 10.1183/23120541.00072-2019 (PMC6513037; doi:10.1183/23120541.00072-2019), 2019-05-10
Supplement: 00072-2019.supp.pdf [file 00072-2019.supp.pdf]

## Supplementary material

**Title: A systematic evaluation of the outcome measures reported in randomized controlled trials on the management of COPD exacerbations.**

**Authors:** Alexander G. Mathioudakis<sup>1,2</sup>, Mia Moberg<sup>3</sup>, Julie Janner<sup>3</sup>, Pablo Alonso-Coello<sup>4</sup>, Jørgen Vestbo<sup>1,2</sup>

<sup>1</sup> Division of Infection, Immunity and Respiratory Medicine, The University of Manchester, UK.

<sup>2</sup> Manchester University Foundation Trust, Wythenshawe Hospital, Southmoor Road, Manchester, UK

<sup>3</sup> Department of Respiratory Medicine, Hvidovre University Hospital, Hvidovre, Denmark.

<sup>4</sup> Cochrane Iberoamérica, Biomedical Research Institute Sant Pau (IIB Sant Pau-CIBERESP), Barcelona, Spain.

**Keywords:** COPD, Exacerbations, COPD exacerbations, Trials Methods, Study population, Study outcomes, Endpoints, Systematic Review.

**@ERSpublications:** Comparability of RCTs evaluating the management of COPD exacerbations is limited by heterogeneity in their design. Standardization of the reported outcome measures would facilitate researchers to compare, contrast and synthesize them.

**Corresponding author:**

Prof. Jørgen Vestbo DMSc, FRCP, FERS, FMedSci

Division of Infection, Immunity and Respiratory Medicine,

The University of Manchester, UK

Jorgen.Vestbo@manchester.ac.uk

**Figure S1: Search strategy**

|                                       |     |                                                                  |
|---------------------------------------|-----|------------------------------------------------------------------|
| Chronic Obstructive Pulmonary Disease | #1  | Chronic Obstructive Pulmonary Disease [MH]                       |
|                                       | #2  | Lung Diseases, Obstructive [MH:NOEXP]                            |
|                                       | #3  | Emphysema [MH]                                                   |
|                                       | #4  | Chronic Bronchitis [MH]                                          |
|                                       | #5  | COPD [tiab]                                                      |
|                                       | #6  | COAD [tiab]                                                      |
|                                       | #7  | “Chronic Bronchitis” [tiab]                                      |
|                                       | #8  | Emphysema [tiab]                                                 |
|                                       | #9  | Obstructive[ti]                                                  |
|                                       | #10 | (Pulmonary OR Respiratory OR Airway OR Airflow OR Lung)[ti]      |
|                                       | #11 | #9 AND #10                                                       |
|                                       | #12 | #1 OR #2 OR #3 OR #4 OR #5 OR #6 OR #7 OR #8 OR #11              |
| Exacerbation                          | #13 | Disease Exacerbation [MH]                                        |
|                                       | #14 | Exacerbation [tiab]                                              |
|                                       | #15 | Exacerbation* [tiab]                                             |
|                                       | #16 | #13 OR #14 OR #15                                                |
| RCT Filter                            | #17 | randomized controlled trial [pt]                                 |
|                                       | #18 | controlled clinical trial [pt]                                   |
|                                       | #19 | randomized [tiab]                                                |
|                                       | #20 | placebo [tiab]                                                   |
|                                       | #21 | clinical trials as topic [mesh: noexp]                           |
|                                       | #22 | randomly [tiab]                                                  |
|                                       | #23 | trial [ti]                                                       |
|                                       | #24 | #17 OR #18 OR #19 OR #20 OR #21 OR #22 OR #23                    |
| SR Filter                             | #25 | Medline[tiab]                                                    |
|                                       | #26 | Systematic[tiab] and (review[tiab])                              |
|                                       | #27 | Meta analysis[publication type]                                  |
|                                       | #28 | Meta-analysis[tiab]                                              |
|                                       | #29 | Metaanalysis[tiab]                                               |
|                                       | #30 | #25 OR #26 OR #27 OR #28 OR #29                                  |
| Final selection                       | #31 | Search ("2006"[Date - Publication] : "2017"[Date - Publication]) |
|                                       | #32 | animals [mh] NOT humans [mh]                                     |
|                                       | #33 | #12 AND #16 AND #31 AND (#24 OR #30)                             |
|                                       | #34 | #33 NOT #32                                                      |

Figure S2: PRISMA Flowchart

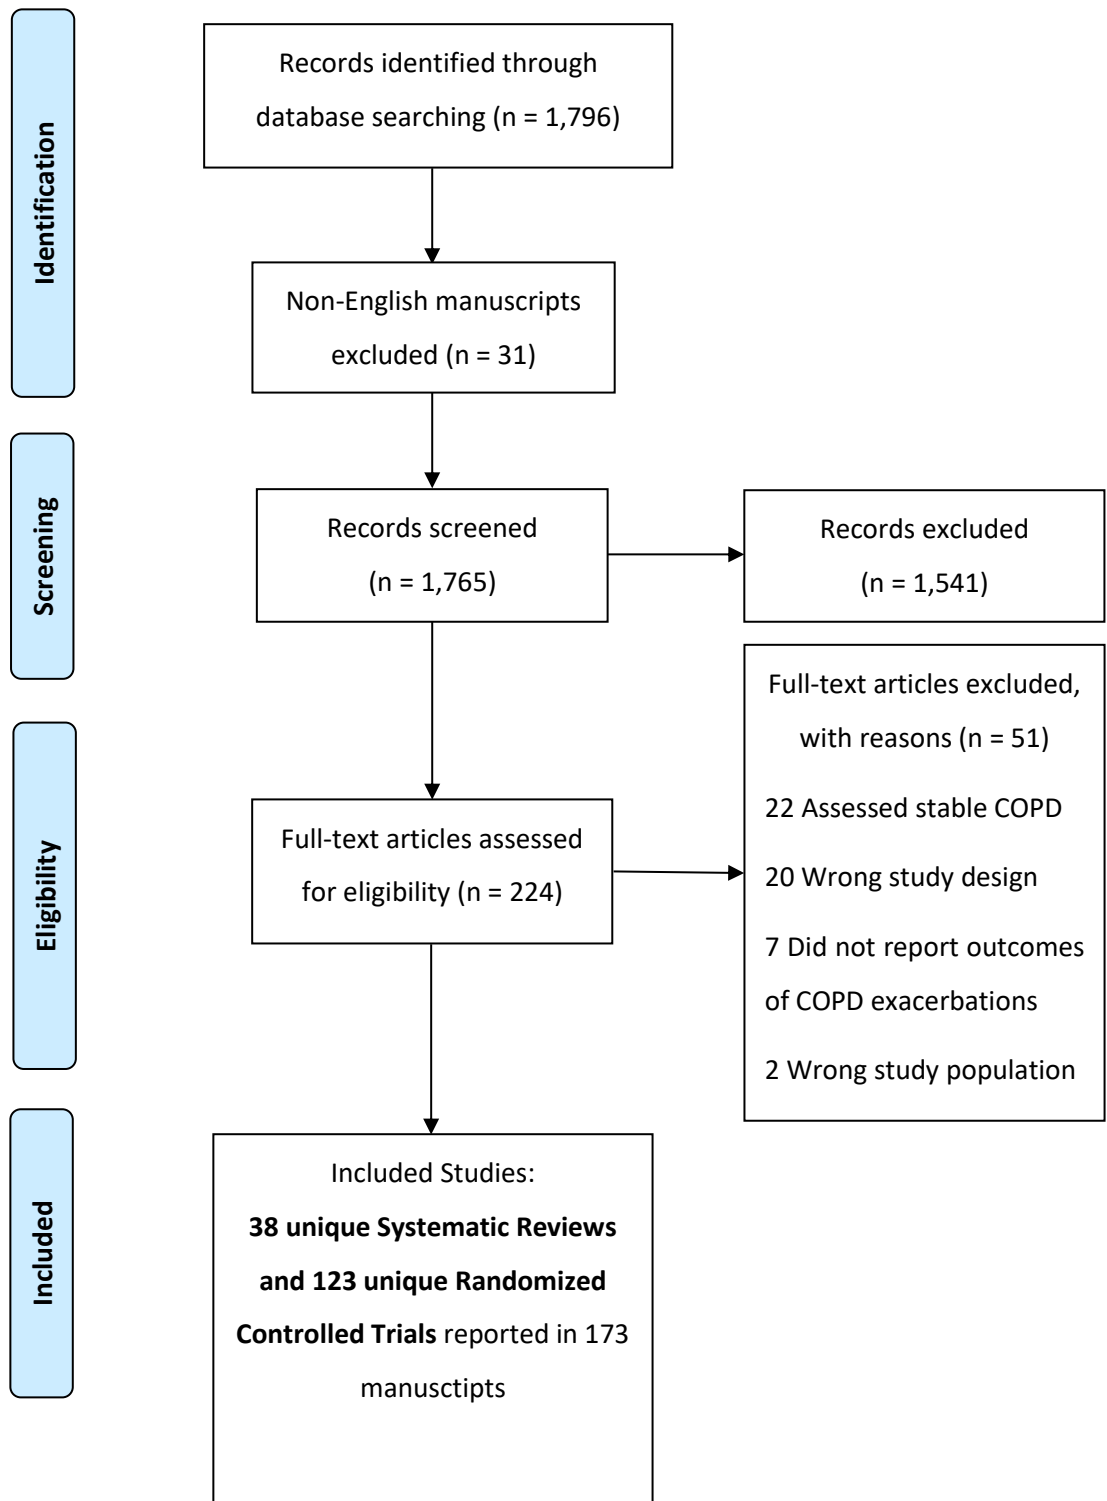

## List of Included Studies

### Systematic Reviews

1. Ma Z, Zhang W. Short-term versus longer duration of glucocorticoid therapy for exacerbations of chronic obstructive pulmonary disease. *Pulm Pharmacol Ther*. 2016 Aug 6.
2. Sklar MC, Beloncle F, Katsios CM, Brochard L, Friedrich JO. Extracorporeal carbon dioxide removal in patients with chronic obstructive pulmonary disease: a systematic review. *Intensive Care Med*. 2015 Oct;41(10):1752-62.
3. Abroug F, Ouanes I, Abroug S, Dachraoui F, Abdallah SB, Hammouda Z, Ouanes-Besbes L. Systemic corticosteroids in acute exacerbation of COPD: a meta-analysis of controlled studies with emphasis on ICU patients. *Ann Intensive Care*. 2014 Oct 26;4:32.
4. Liu S, Shergis J, Chen X, Yu X, Guo X, Zhang AL, Lu C, Xue CC. Chinese herbal medicine (weijing decoction) combined with pharmacotherapy for the treatment of acute exacerbations of chronic obstructive pulmonary disease. *Evid Based Complement Alternat Med*. 2014;2014:257012.
5. Liu KX, Xu B, Wang J, Zhang J, Ding HB, Ariani F, Qu JM, Lin QC. Efficacy and safety of moxifloxacin in acute exacerbations of chronic bronchitis and COPD: a systematic review and meta-analysis. *J Thorac Dis*. 2014 Mar;6(3):221-9.
6. Shivanthan MC, Rajapakse S. Magnesium for acute exacerbation of chronic obstructive pulmonary disease: A systematic review of randomised trials. *Ann Thorac Med*. 2014 Apr;9(2):77-80.
7. Walters JA, Tan DJ, White CJ, Gibson PG, Wood-Baker R, Walters EH. Systemic corticosteroids for acute exacerbations of chronic obstructive pulmonary disease. *Cochrane Database Syst Rev*. 2014 Sep 1;(9):CD001288.

8. Woods JA, Wheeler JS, Finch CK, Pinner NA. Corticosteroids in the treatment of acute exacerbations of chronic obstructive pulmonary disease. *Int J Chron Obstruct Pulmon Dis*. 2014 May 3;9:421-30.
9. Cheng T, Gong Y, Guo Y, Cheng Q, Zhou M, Shi G, Wan H. Systemic corticosteroid for COPD exacerbations, whether the higher dose is better? A meta-analysis of randomized controlled trials. *Clin Respir J*. 2013 Oct;7(4):305-18.
10. Smith TA, Davidson PM, Lam LT, Jenkins CR, Ingham JM. The use of non-invasive ventilation for the relief of dyspnoea in exacerbations of chronic obstructive pulmonary disease; a systematic review. *Respirology*. 2012 Feb;17(2):300-7.
11. Vollenweider DJ, Jarrett H, Steurer-Stey CA, Garcia-Aymerich J, Puhan MA. Antibiotics for exacerbations of chronic obstructive pulmonary disease. *Cochrane Database Syst Rev*. 2012 Dec 12;12:CD010257. AND Ram FS, Rodriguez-Roisin R, Granados-Navarrete A, Garcia-Aymerich J, Barnes NC. Antibiotics for exacerbations of chronic obstructive pulmonary disease. *Cochrane Database Syst Rev*. 2006 Apr 19;(2):CD004403.
12. Lodewijckx C, Sermeus W, Panella M, Deneckere S, Leigheb F, Decramer M, Vanhaecht K. Impact of care pathways for in-hospital management of COPD exacerbation: a systematic review. *Int J Nurs Stud*. 2011 Nov;48(11):1445-56.
13. Hill K, Patman S, Brooks D. Effect of airway clearance techniques in patients experiencing an acute exacerbation of chronic obstructive pulmonary disease: a systematic review. *Chron Respir Dis*. 2010;7(1):9-17.
14. Korbila IP, Manta KG, Siempos II, Dimopoulos G, Falagas ME. Penicillins vs trimethoprim-based regimens for acute bacterial exacerbations of chronic bronchitis: meta-analysis of randomized controlled trials. *Can Fam Physician*. 2009 Jan;55(1):60-7.
15. Falagas ME, Avgeri SG, Matthaiou DK, Dimopoulos G, Siempos II. Short- versus long-duration antimicrobial treatment for exacerbations of chronic bronchitis: a meta-analysis. *J Antimicrob Chemother*. 2008 Sep;62(3):442-50.

16. Puhan MA, Vollenweider D, Steurer J, Bossuyt PM, Ter Riet G. Where is the supporting evidence for treating mild to moderate chronic obstructive pulmonary disease exacerbations with antibiotics? A systematic review. *BMC Med.* 2008 Oct 10;6:28.
17. Dimopoulos G, Siempos II, Korbila IP, Manta KG, Falagas ME. Comparison of first-line with second-line antibiotics for acute exacerbations of chronic bronchitis: a metaanalysis of randomized controlled trials. *Chest.* 2007 Aug;132(2):447-55.
18. Puhan MA, Vollenweider D, Latshang T, Steurer J, Steurer-Stey C. Exacerbations of chronic obstructive pulmonary disease: when are antibiotics indicated? A systematic review. *Respir Res.* 2007 Apr 4;8:30.
19. Siempos II, Dimopoulos G, Korbila IP, Manta K, Falagas ME. Macrolides, quinolones and amoxicillin/clavulanate for chronic bronchitis: a meta-analysis. *Eur Respir J.* 2007 Jun;29(6):1127-37.
20. Wood-Baker R, Walters J, Walters EH. Systemic corticosteroids in chronic obstructive pulmonary disease: an overview of Cochrane systematic reviews. *Respir Med.* 2007 Mar;101(3):371-7.
21. Austin M, Wood-Baker R. Oxygen therapy in the pre-hospital setting for acute exacerbations of chronic obstructive pulmonary disease. *Cochrane Database Syst Rev.* 2006 Jul 19;(3):CD005534.
22. van Geffen WH, Douma WR, Slebos DJ, Kerstjens HA. Bronchodilators delivered by nebuliser versus pMDI with spacer or DPI for exacerbations of COPD. *Cochrane Database Syst Rev.* 2016 Aug 29;(8):CD011826.
23. Niederman MS, Anzueto A, Sethi S, Choudhri S, Kureishi A, Haverstock D, Perroncel R. Eradication of *H. influenzae* in AECB: A pooled analysis of moxifloxacin phase III trials compared with macrolide agents. *Respir Med.* 2006 Oct;100(10):1781-90.

24. El Moussaoui R, Roede BM, Speelman P, Bresser P, Prins JM, Bossuyt PM. Short-course antibiotic treatment in acute exacerbations of chronic bronchitis and COPD: a meta-analysis of double-blind studies. *Thorax*. 2008 May;63(5):415-22.
25. Jeppesen E, Brurberg KG, Vist GE, Wedzicha JA, Wright JJ, Greenstone M, Walters JA. Hospital at home for acute exacerbations of chronic obstructive pulmonary disease. *Cochrane Database Syst Rev*. 2012 May 16;(5):CD003573.
26. Tang CY, Taylor NF, Blackstock FC. Chest physiotherapy for patients admitted to hospital with an acute exacerbation of chronic obstructive pulmonary disease (COPD): a systematic review. *Physiotherapy*. 2010 Mar;96(1):1-13.
27. Zhong Y, Mao B, Wang G, Fan T, Liu X, Diao X, Fu J. Tanreqing injection combined with conventional Western medicine for acute exacerbations of chronic obstructive pulmonary disease: a systematic review. *J Altern Complement Med*. 2010 Dec;16(12):1309-19.
28. Echevarria C, Brewin K, Horobin H, Bryant A, Corbett S, Steer J, Bourke SC. Early Supported Discharge/Hospital At Home For Acute Exacerbation of Chronic Obstructive Pulmonary Disease: A Review and Meta-Analysis. *COPD*. 2016 Aug;13(4):523-33.
29. Abroug F, Ouanes-Besbes L, Hammouda Z, Benabidallah S, Dachraoui F, Ouanes I, Jolliet P. Noninvasive ventilation with helium-oxygen mixture in hypercapnic COPD exacerbation: aggregate meta-analysis of randomized controlled trials. *Ann Intensive Care*. 2017 Dec;7(1):59.
30. Lin C, Pang Q. Meta-analysis and systematic review of procalcitonin-guided treatment in acute exacerbation of chronic obstructive pulmonary disease. *Clin Respir J*. 2018 Jan;12(1):10-15.
31. Liu S, Chen J, He Y, Wu L, Lai J, Zuo J, Yang L, Guo X. Comparative effectiveness of six Chinese herb formulas for acute exacerbation of chronic obstructive pulmonary disease: protocol for systematic review and network meta-analysis. *BMJ Open*. 2017 Aug 11;7(8):e017099.

32. Mathioudakis AG, Chatzimavridou-Grigoriadou V, Corlateanu A, Vestbo J. Procalcitonin to guide antibiotic administration in COPD exacerbations: a meta-analysis. *Eur Respir Rev.* 2017 Jan 31;26(143). pii: 160073.
33. Osadnik CR, Tee VS, Carson-Chahhoud KV, Picot J, Wedzicha JA, Smith BJ. Non-invasive ventilation for the management of acute hypercapnic respiratory failure due to exacerbation of chronic obstructive pulmonary disease. *Cochrane Database Syst Rev.* 2017 Jul 13;7:CD004104.
34. Pleasants RA, Wang T, Xu X, Beiko T, Bei H, Zhai S, Drummond MB. Nebulized Corticosteroids in the Treatment of COPD Exacerbations: Systematic Review, Meta-Analysis, and Clinical Perspective. *Respir Care.* 2018 Oct;63(10):1302-1310.
35. Stolbrink M, Amiry J, Blakey JD. Does antibiotic treatment duration affect the outcomes of exacerbations of asthma and COPD? A systematic review. *Chron Respir Dis.* 2018 Aug;15(3):225-240.
36. Walters JA, Tan DJ, White CJ, Wood-Baker R. Different durations of corticosteroid therapy for exacerbations of chronic obstructive pulmonary disease. *Cochrane Database Syst Rev.* 2018 Mar 19;3:CD006897.
37. Wu X, Shao C, Zhang L, Tu J, Xu H, Lin Z, Xu S, Yu B, Tang Y, Li S. The effect of helium-oxygen-assisted mechanical ventilation on chronic obstructive pulmonary disease exacerbation: A systemic review and meta-analysis. *Clin Respir J.* 2018 Mar;12(3):1219-1227.
38. Zhang HL, Tan M, Qiu AM, Tao Z, Wang CH. Antibiotics for treatment of acute exacerbation of chronic obstructive pulmonary disease: a network meta-analysis. *BMC Pulm Med.* 2017 Dec 12;17(1):196.

## **Randomized Controlled Trials**



1. Effing T, Kerstjens H, van der Valk P, Zielhuis G, van der Palen J. (Cost)-effectiveness of self-treatment of exacerbations on the severity of exacerbations in patients with COPD: the COPE II study. *Thorax*. 2009 Nov;64(11):956-62. AND Zwerink M, Kerstjens HA, van der Palen J, van der Valk P, Brusse-Keizer M, Zielhuis G, Effing T. (Cost)-effectiveness of self-treatment of exacerbations in patients with COPD: 2 years follow-up of a RCT. *Respirology*. 2016 Apr;21(3):497-503.
2. Vermeersch K, Gabrovská M, Deslypere G, Demedts IK, Slabbynck H, Aumann J, Ninane V, Verleden GM, Troosters T, Bogaerts K, Brusselle GG, Janssens W. The Belgian trial with azithromycin for acute COPD exacerbations requiring hospitalization: an investigator-initiated study protocol for a multicenter, randomized, double-blind, placebo-controlled trial. *Int J Chron Obstruct Pulmon Dis*. 2016 Mar 31;11:687-96.
3. Giusti M, Blasi F, Iori I, Mazzone A, Sgambato F, Politi C, Colagrande P, Casali A, Valerio A, Gussoni G, Bonizzoni E, Campanini M. Prulifloxacin vs Levofloxacin for Exacerbation of COPD after Failure of Other Antibiotics. *COPD*. 2016 Oct;13(5):555-60.
4. Hitchings AW, Lai D, Jones PW, Baker EH; Metformin in COPD Trial Team. Metformin in severe exacerbations of chronic obstructive pulmonary disease: a randomised controlled trial. *Thorax*. 2016 Jul;71(7):587-93.
5. Torres-Sánchez I, Valenza MC, Sáez-Roca G, Cabrera-Martos I, López-Torres I, Rodríguez-Torres J. Results of a Multimodal Program During Hospitalization in Obese COPD Exacerbated Patients. *COPD*. 2016;13(1):19-25.
6. Corti C, Fally M, Fabricius-Bjerre A, Mortensen K, Jensen BN, Andreassen HF, Porsbjerg C, Knudsen JD, Jensen JU. Point-of-care procalcitonin test to reduce antibiotic exposure in patients hospitalized with acute exacerbation of COPD. *Int J Chron Obstruct Pulmon Dis*. 2016 Jun 22;11:1381-9.

7. Öncü E, Zincir H. The Effect of Transcutaneous Electrical Nerve Stimulation in Patients with Acute Exacerbation of Chronic Obstructive Pulmonary Disease: Randomized Controlled Trial. *J Clin Nurs*. 2016 Jun 21.
8. Rhee CK, Chang JH, Choi EG, Kim HK, Kwon YS, Kyung SY, Lee JH, Park MJ, Yoo KH, Oh YM. Zabofloxacin versus moxifloxacin in patients with COPD exacerbation: a multicenter, double-blind, double-dummy, randomized, controlled, Phase III, non-inferiority trial. *Int J Chron Obstruct Pulmon Dis*. 2015 Oct 22;10:2265-75.
9. Moretti M, Fagnani S. Erdosteine reduces inflammation and time to first exacerbation postdischarge in hospitalized patients with AECOPD. *Int J Chron Obstruct Pulmon Dis*. 2015 Oct 28;10:2319-25.
10. Mukerji S, Shahpuri B, Clayton-Smith B, Smith N, Armstrong P, Hardy M, Marchant G, Marsh E. Intravenous magnesium sulphate as an adjuvant therapy in acute exacerbations of chronic obstructive pulmonary disease: a single centre, randomised, double-blinded, parallel group, placebo-controlled trial: a pilot study. *N Z Med J*. 2015 Nov 20;128(1425):34-42.
11. Rohde GG, Koch A, Welte T; ABACOPD study group. Randomized double blind placebo-controlled study to demonstrate that antibiotics are not needed in moderate acute exacerbations of COPD--the ABACOPD study. *BMC Pulm Med*. 2015 Jan 27;15:5. doi: 10.1186/1471-2466-15-5.
12. Sun X, He Z, Zhang J, Deng J, Bai J, Li M, Zhong X. Compare the efficacy of inhaled budesonide and systemic methylprednisolone on systemic inflammation of AECOPD. *Pulm Pharmacol Ther*. 2015 Apr;31:111-6.
13. Verduri A, Luppi F, D'Amico R, Balduzzi S, Vicini R, Liverani A, Ruggieri V, Plebani M, Barbaro MP, Spanevello A, Canonica GW, Papi A, Fabbri LM, Beghè B; FARM58J2XH Study Group. Antibiotic treatment of severe exacerbations of chronic obstructive pulmonary disease with procalcitonin: a randomized noninferiority trial. *PLoS One*. 2015 Mar 11;10(3):e0118241.

14. Wilson R, Anzueto A, Miravittles M, Arvis P, Haverstock D, Trajanovic M, Sethi S. Prognostic factors for clinical failure of exacerbations in elderly outpatients with moderate-to-severe COPD. *Int J Chron Obstruct Pulmon Dis.* 2015 Jun 2;10:985-93. AND Wilson R, Anzueto A, Miravittles M, Arvis P, Alder J, Haverstock D, Trajanovic M, Sethi S. Moxifloxacin versus amoxicillin/clavulanic acid in outpatient acute exacerbations of COPD: MAESTRAL results. *Eur Respir J.* 2012 Jul;40(1):17-27. AND Wilson R, Anzueto A, Miravittles M, Arvis P, Faragó G, Haverstock D, Trajanovic M, Sethi S. A novel study design for antibiotic trials in acute exacerbations of COPD: MAESTRAL methodology. *Int J Chron Obstruct Pulmon Dis.* 2011;6:373-83. AND Sethi S, Anzueto A, Miravittles M, Arvis P, Alder J, Haverstock D, Trajanovic M, Wilson R. Determinants of bacteriological outcomes in exacerbations of chronic obstructive pulmonary disease. *Infection.* 2016 Feb;44(1):65-76.
15. Liao LY, Chen KM, Chung WS, Chien JY. Efficacy of a respiratory rehabilitation exercise training package in hospitalized elderly patients with acute exacerbation of COPD: a randomized control trial. *Int J Chron Obstruct Pulmon Dis.* 2015 Aug 27;10:1703-9.
16. Ayfer Aytemur Z, Baysak A, Ozdemir O, Köse T, Sayiner A. N-acetylcysteine in patients with COPD exacerbations associated with increased sputum. *Wien Klin Wochenschr.* 2015 Apr;127(7-8):256-61.
17. Brunetti L, Poiani G, Dhanaliwala F, Poppiti K, Kang H, Suh DC. Clinical outcomes and treatment cost comparison of levalbuterol versus albuterol in hospitalized adults with chronic obstructive pulmonary disease or asthma. *Am J Health Syst Pharm.* 2015 Jun 15;72(12):1026-35.
18. He M, Yu S, Wang L, Lv H, Qiu Z. Efficiency and safety of pulmonary rehabilitation in acute exacerbation of chronic obstructive pulmonary disease. *Med Sci Monit.* 2015 Mar 18;21:806-12.
19. Jakobsen AS, Laursen LC, Rydahl-Hansen S, Østergaard B, Gerds TA, Emme C, Schou L, Phanareth K. Home-based telehealth hospitalization for exacerbation of chronic

obstructive pulmonary disease: findings from "the virtual hospital" trial. *Telemed J E Health*. 2015 May;21(5):364-73. AND Emme C, Mortensen EL, Rydahl-Hansen S, Østergaard B, Svarre Jakobsen A, Schou L, Phanareth K. The impact of virtual admission on self-efficacy in patients with chronic obstructive pulmonary disease - a randomised clinical trial. *J Clin Nurs*. 2014 Nov;23(21-22):3124-37. AND Schou L, Østergaard B, Rasmussen LS, Rydahl-Hansen S, Jakobsen AS, Emme C, Phanareth K. Telemedicine-based treatment versus hospitalization in patients with severe chronic obstructive pulmonary disease and exacerbation: effect on cognitive function. A randomized clinical trial. *Telemed J E Health*. 2014 Jul;20(7):640-6. AND Valenza MC, Valenza-Peña G, Torres-Sánchez I, González-Jiménez E, Conde-Valero A, Valenza-Demet G. Effectiveness of controlled breathing techniques on anxiety and depression in hospitalized patients with COPD: a randomized clinical Trial. *Respir Care*. 2014 Feb;59(2):209-15. AND Jakobsen AS, Laursen LC, Østergaard B, Rydahl-Hansen S, Phanareth KV. Hospital-admitted COPD patients treated at home using telemedicine technology in The Virtual Hospital Trial: methods of a randomized effectiveness trial. *Trials*. 2013 Sep 3;14:280. AND Schou L, Ostergaard B, Rydahl-Hansen S, Rasmussen LS, Emme C, Jakobsen AS, Phanareth K. A randomised trial of telemedicine-based treatment versus conventional hospitalisation in patients with severe COPD and exacerbation - effect on self-reported outcome. *J Telemed Telecare*. 2013 Apr 23. [Epub ahead of print].

20. Jia Z, Feng Z, Tian R, Wang Q, Wang L. Thymosin  $\alpha$ 1 plus routine treatment inhibit inflammatory reaction and improve the quality of life in AECOPD patients. *Immunopharmacol Immunotoxicol*. 2015;37(4):388-92.

21. Jiang D, Wang X, Su Q, Jiang S, Yuan F, Zhang C, Gong F, Dong Q, Shi J, Chen B. Milkvetch root improves immune function in patients with acute exacerbation of COPD. *Biomed Mater Eng*. 2015;26 Suppl 1:S2113-21.

22. Solooki M, Miri M, Mokhtari M, Valai M, Sistanizad M, Kouchek M. Magnesium Sulfate in Exacerbations of COPD in Patients Admitted to Internal Medicine Ward. *Iran J Pharm Res*. 2014 Fall;13(4):1235-9.

23. Abroug F, Ouanes-Besbes L, Fkih-Hassen M, Ouanes I, Ayed S, Dachraoui F, Brochard L, Elatrous S. Prednisone in COPD exacerbation requiring ventilatory support: an open-label randomised evaluation. *Eur Respir J*. 2014 Mar;43(3):717-24.
24. Borges RC, Carvalho CR. Impact of resistance training in chronic obstructive pulmonary disease patients during periods of acute exacerbation. *Arch Phys Med Rehabil*. 2014 Sep;95(9):1638-45.
25. Brusse-Keizer M, VanderValk P, Hendrix R, Kerstjens H, van der Palen J. Necessity of amoxicillin clavulanic acid in addition to prednisolone in mild-to-moderate COPD exacerbations. *BMJ Open Respir Res*. 2014 Dec 30;1(1):e000052.
26. Ceviker Y, Sayiner A. Comparison of two systemic steroid regimens for the treatment of COPD exacerbations. *Pulm Pharmacol Ther*. 2014 Apr;27(2):179-83.
27. Dong L, Xia JW, Gong Y, Chen Z, Yang HH, Zhang J, He J, Chen XD. Effect of lianhuapingwen capsules on airway inflammation in patients with acute exacerbation of chronic obstructive pulmonary disease. *Evid Based Complement Alternat Med*. 2014;2014:637969.
28. Greening NJ, Williams JE, Hussain SF, Harvey-Dunstan TC, Bankart MJ, Chaplin EJ, Vincent EE, Chimera R, Morgan MD, Singh SJ, Steiner MC. An early rehabilitation intervention to enhance recovery during hospital admission for an exacerbation of chronic respiratory disease: randomised controlled trial. *BMJ*. 2014 Jul 8;349:g4315. doi: 10.1136/bmj.g4315.
29. Greulich T, Nell C, Koepke J, Fechtel J, Franke M, Schmeck B, Haid D, Apelt S, Filipovic S, Kenn K, Janciauskiene S, Vogelmeier C, Koczulla AR. Benefits of whole body vibration training in patients hospitalised for COPD exacerbations - a randomized clinical trial. *BMC Pulm Med*. 2014 Apr 11;14:60.
30. Liu M, Zhong X, Li Y, Zheng F, Wu R, Sun Y, Zhang J. Xuan Bai Cheng Qi formula as an adjuvant treatment of acute exacerbation of chronic obstructive pulmonary disease of the

syndrome type phlegm-heat obstructing the lungs: a multicenter, randomized, double-blind, placebo-controlled clinical trial. *BMC Complement Altern Med*. 2014 Jul 11;14:239.

31. Nicolini A, Santo M, Ferrari-Bravo M, Barlascini C. Open-mouthpiece ventilation versus nasal mask ventilation in subjects with COPD exacerbation and mild to moderate acidosis: a randomized trial. *Respir Care*. 2014 Dec;59(12):1825-31.

32. Noura S, Boudia W, Grissa MH, Beltaief K, Trimech MN, Boubaker H, Marghli S, Letaief M, Boukef R. Magnesium sulfate versus ipratropium bromide in chronic obstructive pulmonary disease exacerbation: a randomized trial. *Am J Ther*. 2014 May-Jun;21(3):152-8.

33. Osadnik CR, McDonald CF, Miller BR, Hill CJ, Tarrant B, Steward R, Chao C, Stodden N, Oliveira CC, Gagliardi N, Holland AE. The effect of positive expiratory pressure (PEP) therapy on symptoms, quality of life and incidence of re-exacerbation in patients with acute exacerbations of chronic obstructive pulmonary disease: a multicentre, randomised controlled trial. *Thorax*. 2014 Feb;69(2):137-43.

34. Qian Y, Xie H, Tian R, Yu K, Wang R. Efficacy of low molecular weight heparin in patients with acute exacerbation of chronic obstructive pulmonary disease receiving ventilatory support. *COPD*. 2014 Apr;11(2):171-6.

35. Wu WW, Hong HH, Shao XP, Rui L, Jing M, Lu GD. Effect of oxygen-driven nebulization at different oxygen flows in acute exacerbation of chronic obstructive pulmonary disease patients. *Am J Med Sci*. 2014 May;347(5):343-6.

36. Yilmazel Ucar E, Araz O, Meral M, Sonkaya E, Saglam L, Kaynar H, Gorguner AM, Akgun M. Two different dosages of nebulized steroid versus parenteral steroid in the management of COPD exacerbations: a randomized control trial. *Med Sci Monit*. 2014 Mar 28;20:513-20.

37. Aaron SD, Vandemheen KL, Maltais F, Field SK, Sin DD, Bourbeau J, Marciniuk DD, FitzGerald JM, Nair P, Mallick R. TNF $\alpha$  antagonists for acute exacerbations of COPD: a randomised double-blind controlled trial. *Thorax*. 2013 Feb;68(2):142-8.

38. Blasi F, Tarsia P, Mantero M, Morlacchi LC, Piffer F. Cefditoren versus levofloxacin in patients with exacerbations of chronic bronchitis: serum inflammatory biomarkers, clinical efficacy, and microbiological eradication. *Ther Clin Risk Manag.* 2013;9:55-64.
39. Blasi F, Schaberg T, Centanni S, Del Vecchio A, Rosignoli MT, Dionisio P. Prulifloxacin versus levofloxacin in the treatment of severe COPD patients with acute exacerbations of chronic bronchitis. *Pulm Pharmacol Ther.* 2013 Oct;26(5):609-16.
40. de la Poza Abad M, Mas Dalmau G, Moreno Bakedano M, González González AI, Canellas Criado Y, Hernández Anadón S, Rotaecche del Campo R, Torán Monserrat P, Negrete Palma A, Pera G, Borrell Thió E, Llor C, Little P, Alonso Coello P; Delayed Antibiotic Prescription (DAP) Working Group. Rationale, design and organization of the delayed antibiotic prescription (DAP) trial: a randomized controlled trial of the efficacy and safety of delayed antibiotic prescribing strategies in the non-complicated acute respiratory tract infections in general practice. *BMC Fam Pract.* 2013 May 19;14:63.
41. Edwards L, Shirtcliffe P, Wadsworth K, Healy B, Jefferies S, Weatherall M, Beasley R; Magnesium COPD Study Team. Use of nebulised magnesium sulphate as an adjuvant in the treatment of acute exacerbations of COPD in adults: a randomised double-blind placebo-controlled trial. *Thorax.* 2013 Apr;68(4):338-43.
42. Goktalay T, Akdemir SE, Alpaydin AO, Coskun AS, Celik P, Yorgancioglu A. Does high-frequency chest wall oscillation therapy have any impact on the infective exacerbations of chronic obstructive pulmonary disease? A randomized controlled single-blind study. *Clin Rehabil.* 2013 Aug;27(8):710-8.
43. Goossens LM, Utens CM, Smeenk FW, van Schayck OC, van Vliet M, van Litsenburg W, Braken MW, Rutten-van Mölken MP. Cost-effectiveness of early assisted discharge for COPD exacerbations in The Netherlands. *Value Health.* 2013 Jun;16(4):517-28. AND Utens CM, Goossens LM, Smeenk FW, Rutten-van Mölken MP, van Vliet M, Braken MW, van Eijnsden LM, van Schayck OC. Early assisted discharge with generic community nursing for

chronic obstructive pulmonary disease exacerbations: results of a randomised controlled trial. *BMJ Open*. 2012 Oct 16;2(5). pii: e001684. AND Utens CM, Goossens LM, Smeenk FW, van Schayck OC, van Litsenburg W, Janssen A, van Vliet M, Seezink W, Demunck DR, van de Pas B, de Bruijn PJ, van der Pouw A, Retera JM, de Laat-Bierings P, van Eijnsden L, Braken M, Eijsermans R, Rutten-van Mölken MP. Effectiveness and cost-effectiveness of early assisted discharge for chronic obstructive pulmonary disease exacerbations: the design of a randomised controlled trial. *BMC Public Health*. 2010 Oct 18;10:618.

44. Kurzaj M, Wierzejski W, Dor A, Stawska J, Rożek K. The impact of specialized physiotherapy methods on BODE index in COPD patients during hospitalization. *Adv Clin Exp Med*. 2013 Sep-Oct;22(5):721-30.

45. Leuppi JD, Schuetz P, Bingisser R, Bodmer M, Briel M, Drescher T, Duerring U, Henzen C, Leibbrandt Y, Maier S, Miedinger D, Müller B, Scherr A, Schindler C, Stoeckli R, Viatte S, von Garnier C, Tamm M, Rutishauser J. Short-term vs conventional glucocorticoid therapy in acute exacerbations of chronic obstructive pulmonary disease: the REDUCE randomized clinical trial. *JAMA*. 2013 Jun 5;309(21):2223-31. AND Schuetz P, Leuppi JD, Tamm M, Briel M, Bingisser R, Dürring U, Müller B, Schindler C, Viatte S, Rutishauser J. Short versus conventional term glucocorticoid therapy in acute exacerbation of chronic obstructive pulmonary disease - the "REDUCE" trial. *Swiss Med Wkly*. 2010 Oct 18;140:w13109.

46. Lun CT, Chan VL, Leung WS, Cheung AP, Cheng SL, Tsui MS, Chu CM. A pilot randomized study comparing two methods of non-invasive ventilation withdrawal after acute respiratory failure in chronic obstructive pulmonary disease. *Respirology*. 2013 Jul;18(5):814-9.

47. Segreti A, Fiori E, Calzetta L, Sabatini M, Segreti V, Rogliani P, Cazzola M. The effect of indacaterol during an acute exacerbation of COPD. *Pulm Pharmacol Ther*. 2013 Dec;26(6):630-4.



48. Sheikh Motahar Vahedi H, Mahshidfar B, Rabiee H, Saadat S, Shokoohi H, Chardoli M, Rahimi-Movaghar V. The adjunctive effect of nebulized furosemide in COPD exacerbation: a randomized controlled clinical trial. *Respir Care*. 2013 Nov;58(11):1873-7.
49. Shi X, Li H. Anticoagulation therapy in patients with chronic obstructive pulmonary disease in the acute exacerbation stage. *Exp Ther Med*. 2013 May;5(5):1367-1370.
50. Utens CM, Goossens LM, van Schayck OC, Rutten-van Mölken MP, van Litsenburg W, Janssen A, van der Pouw A, Smeenk FW. Patient preference and satisfaction in hospital-at-home and usual hospital care for COPD exacerbations: results of a randomised controlled trial. *Int J Nurs Stud*. 2013 Nov;50(11):1537-49.
51. Yoon HI, Lee CH, Kim DK, Park GM, Lee SM, Yim JJ, Kim JY, Lee JH, Lee CT, Chung HS, Kim YW, Han SK, Yoo CG. Efficacy of levofloxacin versus cefuroxime in treating acute exacerbations of chronic obstructive pulmonary disease. *Int J Chron Obstruct Pulmon Dis*. 2013;8:329-34.
52. Bafadhel M, McKenna S, Terry S, Mistry V, Pancholi M, Venge P, Lomas DA, Barer MR, Johnston SL, Pavord ID, Brightling CE. Blood eosinophils to direct corticosteroid treatment of exacerbations of chronic obstructive pulmonary disease: a randomized placebo-controlled trial. *Am J Respir Crit Care Med*. 2012 Jul 1;186(1):48-55.
53. Haynes JM. Randomized controlled trial of a breath-activated nebulizer in patients with exacerbation of COPD. *Respir Care*. 2012 Sep;57(9):1385-90.
54. Llor C, Moragas A, Hernández S, Bayona C, Miravittles M. Efficacy of antibiotic therapy for acute exacerbations of mild to moderate chronic obstructive pulmonary disease. *Am J Respir Crit Care Med*. 2012 Oct 15;186(8):716-23.
55. Tang CY, Blackstock FC, Clarence M, Taylor NF. Early rehabilitation exercise program for inpatients during an acute exacerbation of chronic obstructive pulmonary disease: a randomized controlled trial. *J Cardiopulm Rehabil Prev*. 2012 May-Jun;32(3):163-9.

56. Zhang J, Zhao G, Yu X, Pan X. Intravenous diuretic and vasodilator therapy reduce plasma brain natriuretic peptide levels in acute exacerbation of chronic obstructive pulmonary disease. *Respirology*. 2012 May;17(4):715-20.
57. Aggarwal P, Wig N, Bhoi S. Efficacy of two corticosteroid regimens in acute exacerbation of chronic obstructive pulmonary disease. *Int J Tuberc Lung Dis*. 2011 May;15(5):687-92.
58. Alía I, de la Cal MA, Esteban A, Abella A, Ferrer R, Molina FJ, Torres A, Gordo F, Elizalde JJ, de Pablo R, Huete A, Anzueto A. Efficacy of corticosteroid therapy in patients with an acute exacerbation of chronic obstructive pulmonary disease receiving ventilatory support. *Arch Intern Med*. 2011 Nov 28;171(21):1939-46.
59. Antonaglia V, Ferluga M, Molino R, Lucangelo U, Peratoner A, Roman-Pognuz E, De Simoni L, Zin WA. Comparison of noninvasive ventilation by sequential use of mask and helmet versus mask in acute exacerbation of chronic obstructive pulmonary disease: a preliminary study. *Respiration*. 2011;82(2):148-54.
60. Chatterjee S, Biswas T, Dutta A, Sengupta G, Mitra A, Kundu S. Clinical effectiveness and safety of gemifloxacin versus cefpodoxime in acute exacerbation of chronic bronchitis: A randomized, controlled trial. *Indian J Pharmacol*. 2011 Feb;43(1):40-4.
61. Di Marco F, Centanni S, Bellone A, Messinesi G, Pesci A, Scala R, Perren A, Nava S. Optimization of ventilator setting by flow and pressure waveforms analysis during noninvasive ventilation for acute exacerbations of COPD: a multicentric randomized controlled trial. *Crit Care*. 2011;15(6):R283.
62. Woodruff PG, Albert RK, Bailey WC, Casaburi R, Connett JE, Cooper JA Jr, Criner GJ, Curtis JL, Dransfield MT, Han MK, Harnden SM, Kim V, Marchetti N, Martinez FJ, McEvoy CE, Niewoehner DE, Reilly JJ, Rice K, Scanlon PD, Scharf SM, Scirba FC, Washko GR, Lazarus SC; Copd Clinical Research Network. Randomized trial of zileuton for treatment of COPD exacerbations requiring hospitalization. *COPD*. 2011 Feb;8(1):21-9.

63. Schmidbauer W, Ahlers O, Spies C, Dreyer A, Mager G, Kerner T. Early prehospital use of non-invasive ventilation improves acute respiratory failure in acute exacerbation of chronic obstructive pulmonary disease. *Emerg Med J*. 2011 Jul;28(7):626-7.
64. Mahajan AK, Diette GB, Hatipoğlu U, Bilderback A, Ridge A, Harris VW, Dalapathi V, Badlani S, Lewis S, Charbeneau JT, Naureckas ET, Krishnan JA. High frequency chest wall oscillation for asthma and chronic obstructive pulmonary disease exacerbations: a randomized sham-controlled clinical trial. *Respir Res*. 2011 Sep 10;12:120.
65. Austin MA, Wills KE, Blizzard L, Walters EH, Wood-Baker R. Effect of high flow oxygen on mortality in chronic obstructive pulmonary disease patients in prehospital setting: randomised controlled trial. *BMJ*. 2010 Oct 18;341:c5462.
66. Babu AS, Noone MS, Haneef M, Samuel P. The effects of 'on-call/out of hours' physical therapy in acute exacerbations of chronic obstructive pulmonary disease: a randomized controlled trial. *Clin Rehabil*. 2010 Sep;24(9):802-9.
67. Cross J, Elender F, Barton G, Clark A, Shepstone L, Blyth A, Bachmann M, Harvey I; MATREX Research Group. A randomised controlled equivalence trial to determine the effectiveness and cost-utility of manual chest physiotherapy techniques in the management of exacerbations of chronic obstructive pulmonary disease (MATREX). *Health Technol Assess*. 2010 May;14(23):1-147, iii-iv.
68. Daniels JM, Snijders D, de Graaff CS, Vlasplolder F, Jansen HM, Boersma WG. Antibiotics in addition to systemic corticosteroids for acute exacerbations of chronic obstructive pulmonary disease. *Am J Respir Crit Care Med*. 2010 Jan 15;181(2):150-7.
69. Khilnani GC, Saikia N, Banga A, Sharma SK. Non-invasive ventilation for acute exacerbation of COPD with very high PaCO<sub>2</sub>: A randomized controlled trial. *Lung India*. 2010 Jul;27(3):125-30.
70. Li W, Mao B, Wang G, Wang L, Chang J, Zhang Y, Wan MH, Guo J, Zheng YQ. Effect of Tanreqing Injection on treatment of acute exacerbation of chronic obstructive pulmonary

disease with Chinese medicine syndrome of retention of phlegm and heat in Fei. *Chin J Integr Med*. 2010 Apr;16(2):131-7.

71. Maggiore SM, Richard JC, Abroug F, Diehl JL, Antonelli M, Sauder P, Mancebo J, Ferrer M, Lellouche F, Lecourt L, Beduneau G, Brochard L. A multicenter, randomized trial of noninvasive ventilation with helium-oxygen mixture in exacerbations of chronic obstructive lung disease. *Crit Care Med*. 2010 Jan;38(1):145-51.

72. Nouira S, Marghli S, Besbes L, Boukef R, Daami M, Nciri N, Elatrous S, Abroug F. Standard versus newer antibacterial agents in the treatment of severe acute exacerbation of chronic obstructive pulmonary disease: a randomized trial of trimethoprim-sulfamethoxazole versus ciprofloxacin. *Clin Infect Dis*. 2010 Jul 15;51(2):143-9.

73. Troosters T, Probst VS, Crul T, Pitta F, Gayan-Ramirez G, Decramer M, Gosselink R. Resistance training prevents deterioration in quadriceps muscle function during acute exacerbations of chronic obstructive pulmonary disease. *Am J Respir Crit Care Med*. 2010 May 15;181(10):1072-7.

74. Wang J, Xiao Y, Huang W, Xu N, Bai C, Xiu Q, Mei C, Zheng Q. A phase II study of antofloxacin hydrochloride, a novel fluoroquinolone, for the treatment of acute bacterial infections. *Chemotherapy*. 2010;56(5):378-85.

75. Yakoot M, Salem A, Omar AM. Clinical efficacy of farcosolvin syrup (ambroxol-theophylline-guaiphenesin mixture) in the treatment of acute exacerbation of chronic bronchitis. *Int J Chron Obstruct Pulmon Dis*. 2010 Aug 9;5:251-6.

76. Corrado A, Gorini M, Melej R, Baglioni S, Mollica C, Villella G, Consigli GF, Dottorini M, Bigioni D, Toschi M, Eslami A. Iron lung versus mask ventilation in acute exacerbation of COPD: a randomised crossover study. *Intensive Care Med*. 2009 Apr;35(4):648-55.

77. Cosio BG, Iglesias A, Rios A, Noguera A, Sala E, Ito K, Barnes PJ, Agusti A. Low-dose theophylline enhances the anti-inflammatory effects of steroids during exacerbations of COPD. *Thorax*. 2009 May;64(5):424-9.

78. Kodric M, Garuti G, Colomban M, Russi B, Porta RD, Lusuardi M, Confalonieri M. The effectiveness of a bronchial drainage technique (ELTGOL) in COPD exacerbations. *Respirology*. 2009 Apr;14(3):424-8.
79. Llor C, Hernández S, Ribas A, Alvarez C, Cots JM, Bayona C, González I, Miravittles M; BRAMOX Study Group. Efficacy of amoxicillin versus amoxicillin/clavulanate in acute exacerbations of chronic pulmonary obstructive disease in primary care. *Int J Chron Obstruct Pulmon Dis*. 2009;4:45-53.
80. Ställberg B, Selroos O, Vogelmeier C, Andersson E, Ekström T, Larsson K. Budesonide/formoterol as effective as prednisolone plus formoterol in acute exacerbations of COPD. A double-blind, randomised, non-inferiority, parallel-group, multicentre study. *Respir Res*. 2009 Feb 19;10:11.
81. Whale CA, MacLaran SJ, Whale CI, Barnett M. Pilot study to assess the credibility of acupuncture in acute exacerbations of chronic obstructive pulmonary disease. *Acupunct Med*. 2009 Mar;27(1):13-5.
82. Aimonino Ricauda N, Tibaldi V, Leff B, Scarafiotti C, Marinello R, Zancocchi M, Molaschi M. Substitutive "hospital at home" versus inpatient care for elderly patients with exacerbations of chronic obstructive pulmonary disease: a prospective randomized, controlled trial. *J Am Geriatr Soc*. 2008 Mar;56(3):493-500.
83. Bathoorn E, Liesker JJ, Postma DS, Boorsma M, Bondesson E, Koëter GH, Kauffman HF, van Oosterhout AJ, Kerstjens HA. Anti-inflammatory effects of combined budesonide/formoterol in COPD exacerbations. *COPD*. 2008 Oct;5(5):282-90.
84. Kunter E, Ilvan A, Ozmen N, Demirel E, Ozturk A, Avsar K, Sayan O, Kartaloğlu Z. Effect of corticosteroids on hemostasis and pulmonary arterial pressure during chronic obstructive pulmonary disease exacerbation. *Respiration*. 2008;75(2):145-54.

85. van den Broek KM, Wielders PL, Creemers JP, Smeenk FW. Efficacy of formoterol Turbuhaler in the emergency treatment of patients with obstructive airway diseases. *Respir Med.* 2008 Apr;102(4):579-85.
86. Andre-Alves MR, Jardim JR, Frare e Silva R, Fiss E, Freire DN, Teixeira PJ. Comparison between azithromycin and amoxicillin in the treatment of infectious exacerbation of chronic obstructive pulmonary disease. *J Bras Pneumol.* 2007 Jan-Feb;33(1):43-50.
87. de Jong YP, Uil SM, Grotjohan HP, Postma DS, Kerstjens HA, van den Berg JW. Oral or IV prednisolone in the treatment of COPD exacerbations: a randomized, controlled, double-blind study. *Chest.* 2007 Dec;132(6):1741-7.
88. Gotfried M, Busman TA, Norris S, Notario GF. Role for 5-day, once-daily extended-release clarithromycin in acute bacterial exacerbation of chronic bronchitis. *Curr Med Res Opin.* 2007 Feb;23(2):459-66.
89. (SECOND TRIAL INCLUDED): Gotfried M, Busman TA, Norris S, Notario GF. Role for 5-day, once-daily extended-release clarithromycin in acute bacterial exacerbation of chronic bronchitis. *Curr Med Res Opin.* 2007 Feb;23(2):459-66.
90. Gunen H, Hacievliyagil SS, Yetkin O, Gulbas G, Mutlu LC, In E. The role of nebulised budesonide in the treatment of exacerbations of COPD. *Eur Respir J.* 2007 Apr;29(4):660-7.
91. Kardas P. Comparison of patient compliance with once-daily and twice-daily antibiotic regimens in respiratory tract infections: results of a randomized trial. *J Antimicrob Chemother.* 2007 Mar;59(3):531-6.
92. Malliotakis P, Mouloudi E, Prinianakis G, Kondili E, Georgopoulos D. Influence of respiratory efforts on b2-agonist induced bronchodilation in mechanically ventilated COPD patients: a prospective clinical study. *Respir Med.* 2007 Feb;101(2):300-7.
93. Pastaka C, Kostikas K, Karetsi E, Tsolaki V, Antoniadou I, Gourgouliani KI. Non-invasive ventilation in chronic hypercapnic COPD patients with exacerbation and a pH of 7.35 or higher. *Eur J Intern Med.* 2007 Nov;18(7):524-30.

94. Petitpretz P, Choné C, Trémolières F; Investigator Study Group. Levofloxacin 500 mg once daily versus cefuroxime 250 mg twice daily in patients with acute exacerbations of chronic obstructive bronchitis: clinical efficacy and exacerbation-free interval. *Int J Antimicrob Agents*. 2007 Jul;30(1):52-9.
95. Roede BM, Bresser P, El Moussaoui R, Krouwels FH, van den Berg BT, Hooghiemstra PM, de Borgie CA, Speelman P, Bossuyt PM, Prins JM. Three vs. 10 days of amoxicillin-clavulanic acid for type 1 acute exacerbations of chronic obstructive pulmonary disease: a randomised, double-blind study. *Clin Microbiol Infect*. 2007 Mar;13(3):284-90.
96. Ruiz-González A, Giménez A, Gómez-Arbonés X, Soler-González J, Sánchez V, Falguera M, Porcel JM. Open-label, randomized comparison trial of long-term outcomes of levofloxacin versus standard antibiotic therapy in acute exacerbations of chronic obstructive pulmonary disease. *Respirology*. 2007 Jan;12(1):117-21.
97. Stolz D, Christ-Crain M, Bingisser R, Leuppi J, Miedinger D, Müller C, Huber P, Müller B, Tamm M. Antibiotic treatment of exacerbations of COPD: a randomized, controlled trial comparing procalcitonin-guidance with standard therapy. *Chest*. 2007 Jan;131(1):9-19.
98. van Zanten AR, Oudijk M, Nohlmans-Paulssen MK, van der Meer YG, Girbes AR, Polderman KH. Continuous vs. intermittent cefotaxime administration in patients with chronic obstructive pulmonary disease and respiratory tract infections: pharmacokinetics/pharmacodynamics, bacterial susceptibility and clinical efficacy. *Br J Clin Pharmacol*. 2007 Jan;63(1):100-9.
99. Zervos M, Martinez FJ, Amsden GW, Rothermel CD, Treadway G. Efficacy and safety of 3-day azithromycin versus 5-day moxifloxacin for the treatment of acute bacterial exacerbations of chronic bronchitis. *Int J Antimicrob Agents*. 2007 Jan;29(1):56-61.
100. Alvarez-Sala JL, Kardos P, Martínez-Beltrán J, Coronel P, Aguilar L. Clinical and bacteriological efficacy in treatment of acute exacerbations of chronic bronchitis with

cefditoren-pivoxil versus cefuroxime-axetil. *Antimicrob Agents Chemother.* 2006 May;50(5):1762-7.

101. Antonaglia V, Lucangelo U, Zin WA, Peratoner A, De Simoni L, Capitanio G, Pascotto S, Gullo A. Intrapulmonary percussive ventilation improves the outcome of patients with acute exacerbation of chronic obstructive pulmonary disease using a helmet. *Crit Care Med.* 2006 Dec;34(12):2940-5.

102. Gregoretti C, Squadrone V, Fogliati C, Olivieri C, Navalesi P. Transtracheal open ventilation in acute respiratory failure secondary to severe chronic obstructive pulmonary disease exacerbation. *Am J Respir Crit Care Med.* 2006 Apr 15;173(8):877-81.

103. Urueta-Robledo J, Ariza H, Jardim JR, Caballero A, García-Calderón A, Amábile-Cuevas CF, Hernández-Oliva G, Vivar-Orozco R; MOX-CB Study Group. Moxifloxacin versus levofloxacin against acute exacerbations of chronic bronchitis: the Latin American Cohort. *Respir Med.* 2006 Sep;100(9):1504-11. Epub 2006 Feb 28.

104. Sanjari M, Soltani A, Habibi Khorasani A, Zareinejad M. The effect of vitamin D on COPD exacerbation: a double blind randomized placebo-controlled parallel clinical trial. *J Diabetes Metab Disord.* 2016 Aug 26;15(1):33.

105. Ding Z, Li X, Lu Y, Rong G, Yang R, Zhang R, Wang G, Wei X, Ye Y, Qian Z, Liu H, Zhu D, Zhou R, Zhu K, Ni R, Xia K, Luo N, Pei C. A randomized, controlled multicentric study of inhaled budesonide and intravenous methylprednisolone in the treatment on acute exacerbation of chronic obstructive pulmonary disease. *Respir Med.* 2016 Dec;121:39-47.

106. Jolliet P, Ouanes-Besbes L, Abroug F, Ben Khelil J, Besbes M, Garnerio A, Arnal JM, Daviaud F, Chiche JD, Lortat-Jacob B, Diehl JL, Lerolle N, Mercat A, Razazi K, Brun-Buisson C, Durand-Zaleski I, Texereau J, Brochard L. A Multicenter Randomized Trial Assessing the Efficacy of Helium/Oxygen in Severe Exacerbations of Chronic Obstructive Pulmonary Disease. *Am J Respir Crit Care Med.* 2016 Oct 13. [Epub ahead of print]



107. Lellouche F, Bouchard PA, Roberge M, Simard S, L'Her E, Maltais F, Lacasse Y. Automated oxygen titration and weaning with FreeO2 in patients with acute exacerbation of COPD: a pilot randomized trial. *Int J Chron Obstruct Pulmon Dis*. 2016 Aug 24;11:1983-90.
108. Soltaninejad F, Kheiri S, Habibian R, Amra A, Asgari-Savadjani S. Evaluation effects of nebulized gentamicin in exacerbation of chronic obstructive lung disease. *J Res Med Sci*. 2016 Jul 29;21:56.
109. Daubin C, Valette X, Thiollière F, Mira JP, Hazera P, Annane D, Labbe V, Floccard B, Fournel F, Terzi N, Du Cheyron D, Parienti JJ; BPCTrea Study Group. Procalcitonin algorithm to guide initial antibiotic therapy in acute exacerbations of COPD admitted to the ICU: a randomized multicenter study. *Intensive Care Med*. 2018 Apr;44(4):428-437.
110. Bardsley G, Pilcher J, McKinsty S, Shirtcliffe P, Berry J, Fingleton J, Weatherall M, Beasley R. Oxygen versus air-driven nebulisers for exacerbations of chronic obstructive pulmonary disease: a randomised controlled trial. *BMC Pulm Med*. 2018 Oct 3;18(1):157.
111. Emami Ardestani M, Kalantary E, Samaiy V, Taherian K. Methyl prednisolone vs Dexamethasone in Management of COPD Exacerbation; a Randomized Clinical Trial. *Emerg (Tehran)*. 2017;5(1):e35.
112. Bates J, Francis NA, White P, Gillespie D, Thomas-Jones E, Breen R, Kirby N, Hood K, Gal M, Phillips R, Naik G, Cals J, Llor C, Melbye H, Wootton M, Riga E, Cochrane A, Howe R, Fitzsimmons D, Sewell B, Alam MF, Butler CC. General practitioner use of a C-reactive protein point-of-care test to help target antibiotic prescribing in patients with acute exacerbations of chronic obstructive pulmonary disease (the PACE study): study protocol for a randomised controlled trial. *Trials*. 2017 Sep 29;18(1):442. doi: 10.1186/s13063-017-2144-
113. Beltaief K, Msolli MA, Zorgati A, Sekma A, Fakhfakh M, Ben Marzouk M, Boubaker H, Grissa MH, Methamem M, Boukef R, Belguith A, Bouida W, Noura S. Nebulized terbutaline & ipratropium bromide vs terbutaline alone in acute exacerbation of COPD requiring

noninvasive ventilation: a randomized double blind controlled trial. *Acad Emerg Med*. 2018 Aug 29. doi: 10.1111/acem.13560. [Epub ahead of print]

114. Daitx RB, Dos Santos K, Dohnert MB, da Silva TDA, Silva JD. Limited utility of Kinesio Taping® in the physiotherapy treatment for patients with chronic obstructive pulmonary disease exacerbation. *Physiother Theory Pract*. 2018 Oct;34(10):741-746.

115. Echevarria C, Gray J, Hartley T, Steer J, Miller J, Simpson AJ, Gibson GJ, Bourke SC. Home treatment of COPD exacerbation selected by DECAF score: a non-inferiority, randomised controlled trial and economic evaluation. *Thorax*. 2018 Aug;73(8):713-722.

116. Jiang DH, Wang X, Liu LS, Ji DD, Zhang N. The effect of ventilator mask atomization inhalation of ipratropium bromide and budesonide suspension liquid in the treatment of COPD in acute exacerbation period on circulating levels of inflammation and prognosis. *Eur Rev Med Pharmacol Sci*. 2017 Nov;21(22):5211-5216.

117. Öncü E, Zincir H. The effect of transcutaneous electrical nerve stimulation in patients with acute exacerbation of chronic obstructive pulmonary disease: randomised controlled trial. *J Clin Nurs*. 2017 Jul;26(13-14):1834-1844.

118. Park MJ, Rhee CK, Kim YH, Kim DJ, Kim DG, Lee SY, Kim JY. Efficacy and safety of HL301 in the treatment of acute bronchitis and acute exacerbation of chronic bronchitis: a phase 2, randomized, double-blind, placebo-controlled, multicenter study. *Curr Med Res Opin*. 2017 May;33(5):919-925.

119. Sellares J, Ferrer M, Anton A, Loureiro H, Bencosme C, Alonso R, Martinez-Olondris P, Sayas J, Peñacoba P, Torres A. Discontinuing noninvasive ventilation in severe chronic obstructive pulmonary disease exacerbations: a randomised controlled trial. *Eur Respir J*. 2017 Jul 5;50(1). pii: 1601448.

120. Mackay AJ, Patel ARC, Singh R, Sapsford RJ, Donaldson GC, Prasad N, Goehring UM, Nip TK, Wedzicha JA. Randomized Double-Blind Controlled Trial of Roflumilast at Acute

Exacerbations of Chronic Obstructive Pulmonary Disease. *Am J Respir Crit Care Med.* 2017 Sep 1;196(5):656-659.

121. Sivapalan P, Moberg M, Eklöf J, Janner J, Vestbo J, Laub RR, Browatzki A, Armbruster K, Wilcke JT, Seersholm N, Weinreich UM, Titlestad IL, Andreassen HF, Ulrik CS, Bødtger U, Nielsen TL, Hansen EF, Jensen JUS. A multi-center randomized, controlled, open-label trial evaluating the effects of eosinophil-guided corticosteroid-sparing therapy in hospitalised patients with COPD exacerbations - The CORTICO steroid reduction in COPD (CORTICO-COP) study protocol. *BMC Pulm Med.* 2017 Aug 15;17(1):114.

122. Torres-Sánchez I, Valenza MC, Cebriá I, Iranzo MDÀ, López-López L, Moreno-Ramírez MP, Ortiz-Rubio A. Effects of different physical therapy programs on perceived health status in acute exacerbation of chronic obstructive pulmonary disease patients: a randomized clinical trial. *Disabil Rehabil.* 2018 Aug;40(17):2025-2031.

123. van Velzen P, Ter Riet G, Bresser P, Baars JJ, van den Berg BTJ, van den Berg JWK, Brinkman P, Dagelet JWF, Daniels JMA, Groeneveld-Tjong DRGL, Jonkers RE, van Kan C, Krouwels FH, Pool K, Rudolphus A, Sterk PJ, Prins JM. Doxycycline for outpatient-treated acute exacerbations of COPD: a randomised double-blind placebo-controlled trial. *Lancet Respir Med.* 2017 Jun;5(6):492-499.

## **Studies Excluded with Reason**

### **Assessed management of stable COPD, rather than exacerbations**

1. Gold DR, Litonjua AA, Carey VJ, Manson JE, Buring JE, Lee IM, Gordon D, Walter J, Friedenberg G, Hankinson JL, Copeland T, Luttmann-Gibson H. Lung VITAL: Rationale, design, and baseline characteristics of an ancillary study evaluating the effects of vitamin D and/or marine omega-3 fatty acid supplements on acute exacerbations of chronic respiratory disease, asthma control, pneumonia and lung function in adults. *Contemp Clin Trials*. 2016 Mar;47:185-95.
2. Braido F, Melioli G, Cazzola M, Fabbri L, Blasi F, Moretta L, Canonica GW; AIACE Study Group. Sub-lingual administration of a polyvalent mechanical bacterial lysate (PMBL) in patients with moderate, severe, or very severe chronic obstructive pulmonary disease (COPD) according to the GOLD spirometric classification: A multicentre, double-blind, randomised, controlled, phase IV study (AIACE study: Advanced Immunological Approach in COPD Exacerbation). *Pulm Pharmacol Ther*. 2015 Aug;33:75-80.
3. Cazzola M, Calzetta L, Page C, Jardim J, Chuchalin AG, Rogliani P, Matera MG. Influence of N-acetylcysteine on chronic bronchitis or COPD exacerbations: a meta-analysis. *Eur Respir Rev*. 2015 Sep;24(137):451-61.
4. Dal Negro RW, Visconti M, Turco P. Efficacy of erdosteine 900 versus 600 mg/day in reducing oxidative stress in patients with COPD exacerbations: Results of a double blind, placebo-controlled trial. *Pulm Pharmacol Ther*. 2015 Aug;33:47-51.
5. Jennings JH, Thavarajah K, Mendez MP, Eichenhorn M, Kvale P, Yessayan L. Predischarge bundle for patients with acute exacerbations of COPD to reduce readmissions and ED visits: a randomized controlled trial. *Chest*. 2015 May;147(5):1227-34.
6. Song HY, Yong SJ, Hur HK. Effectiveness of a brief self-care support intervention for pulmonary rehabilitation among the elderly patients with chronic obstructive pulmonary disease in Korea. *Rehabil Nurs*. 2014 May-Jun;39(3):147-56.

7. Struik FM, Sprooten RT, Kerstjens HA, Bladder G, Zijnen M, Asin J, Cobben NA, Vonk JM, Wijkstra PJ. Nocturnal non-invasive ventilation in COPD patients with prolonged hypercapnia after ventilatory support for acute respiratory failure: a randomised, controlled, parallel-group study. *Thorax*. 2014 Sep;69(9):826-34.
8. Zheng JP, Wen FQ, Bai CX, Wan HY, Kang J, Chen P, Yao WZ, Ma LJ, Li X, Raiteri L, Sardina M, Gao Y, Wang BS, Zhong NS; PANTHEON study group. Twice daily N-acetylcysteine 600 mg for exacerbations of chronic obstructive pulmonary disease (PANTHEON): a randomised, double-blind placebo-controlled trial. *Lancet Respir Med*. 2014 Mar;2(3):187-94.
9. Jurado Gámez B, Feu Collado N, Jurado García JC, García Gíl F, Muñoz Gomariz E, Jiménez Murillo L, Muñoz Cabrera L. Home intervention and predictor variables for rehospitalization in chronic obstructive pulmonary disease exacerbations. *Arch Bronconeumol*. 2013 Jan;49(1):10-4.
10. Abad-Corpa E, Carrillo-Alcaraz A, Royo-Morales T, Pérez-García MC, Rodríguez-Mondejar JJ, Sáez-Soto A, Iniesta-Sánchez J. Effectiveness of planning hospital discharge and follow-up in primary care for patients with chronic obstructive pulmonary disease: research protocol. *J Adv Nurs*. 2010 Jun;66(6):1365-70.
11. Carr SJ, Hill K, Brooks D, Goldstein RS. Pulmonary rehabilitation after acute exacerbation of chronic obstructive pulmonary disease in patients who previously completed a pulmonary rehabilitation program. *J Cardiopulm Rehabil Prev*. 2009 Sep-Oct;29(5):318-24.
12. Eaton T, Young P, Fergusson W, Moodie L, Zeng I, O'Kane F, Good N, Rhodes L, Poole P, Kolbe J. Does early pulmonary rehabilitation reduce acute health-care utilization in COPD patients admitted with an exacerbation? A randomized controlled study. *Respirology*. 2009 Mar;14(2):230-8.

13. Sridhar M, Taylor R, Dawson S, Roberts NJ, Partridge MR. A nurse led intermediate care package in patients who have been hospitalised with an acute exacerbation of chronic obstructive pulmonary disease. *Thorax*. 2008 Mar;63(3):194-200.
14. Zheng JP, Kang J, Huang SG, Chen P, Yao WZ, Yang L, Bai CX, Wang CZ, Wang C, Chen BY, Shi Y, Liu CT, Chen P, Li Q, Wang ZS, Huang YJ, Luo ZY, Chen FP, Yuan JZ, Yuan BT, Qian HP, Zhi RC, Zhong NS. Effect of carbocisteine on acute exacerbation of chronic obstructive pulmonary disease (PEACE Study): a randomised placebo-controlled study. *Lancet*. 2008 Jun 14;371(9629):2013-8.
15. Siva R, Green RH, Brightling CE, Shelley M, Hargadon B, McKenna S, Monteiro W, Berry M, Parker D, Wardlaw AJ, Pavord ID. Eosinophilic airway inflammation and exacerbations of COPD: a randomised controlled trial. *Eur Respir J*. 2007 May;29(5):906-13.
16. Casas A, Troosters T, Garcia-Aymerich J, Roca J, Hernández C, Alonso A, del Pozo F, de Toledo P, Antó JM, Rodríguez-Roisín R, Decramer M; members of the CHRONIC Project. Integrated care prevents hospitalisations for exacerbations in COPD patients. *Eur Respir J*. 2006 Jul;28(1):123-30. Epub 2006 Apr 12.
17. Shmelev EI, Kunicina YL. Comparison of fenspiride with beclomethasone as adjunctive anti-inflammatory treatment in patients with chronic obstructive pulmonary disease. *Clin Drug Investig*. 2006;26(3):151-9.
18. Sutherland ER, Crapo JD, Bowler RP. N-acetylcysteine and exacerbations of chronic obstructive pulmonary disease. *COPD*. 2006 Dec;3(4):195-202.
19. Wood-Baker R, McGlone S, Venn A, Walters EH. Written action plans in chronic obstructive pulmonary disease increase appropriate treatment for acute exacerbations. *Respirology*. 2006 Sep;11(5):619-26.
20. Silver PC, Kollef MH, Clinkscale D, Watts P, Kidder R, Eads B, Bennett D, Lora C, Quartaro M. A Respiratory Therapist Disease Management Program for Subjects Hospitalized With COPD. *Respir Care*. 2017 Jan;62(1):1-9.

21. Ospina MB, Mrklas K, Deuchar L, Rowe BH, Leigh R, Bhutani M, Stickland MK. A systematic review of the effectiveness of discharge care bundles for patients with COPD. *Thorax*. 2017 Jan;72(1):31-39.

22. Vanhaecht K, Lodewijckx C, Sermeus W, Decramer M, Deneckere S, Leigheb F, Boto P, Kul S, Seys D, Panella M. Impact of a care pathway for COPD on adherence to guidelines and hospital readmission: a cluster randomized trial. *Int J Chron Obstruct Pulmon Dis*. 2016 Nov 23;11:2897-2908.

### **Did not report outcomes of AECOPD**

23. Luo Q, Zheng Z, Cen H, Jiang M, Chen Q. A modified nebulization modality versus classical ultrasonic nebulization and oxygen-driven nebulization in facilitating airway clearance in patients with acute exacerbation of chronic obstructive pulmonary disease: a randomized controlled trial. *J Thorac Dis*. 2015 Jul;7(7):1130-41.

24. Rogliani P, Ora J, Ciapriani C, Senis L, Stirpe E, Cazzola M. Effect of indacaterol on arterial blood gases in patients suffering from acute exacerbation of COPD. *Respir Med*. 2014 Feb;108(2):307-13.

25. Briones Claudett KH, Briones Claudett M, Chung Sang Wong M, Nuques Martinez A, Soto Espinoza R, Montalvo M, Esquinas Rodriguez A, Gonzalez Diaz G, Grunauer Andrade M. Noninvasive mechanical ventilation with average volume assured pressure support (AVAPS) in patients with chronic obstructive pulmonary disease and hypercapnic encephalopathy. *BMC Pulm Med*. 2013 Mar 12;13:12.

26. Vanhaecht K, Sermeus W, Peers J, Lodewijckx C, Deneckere S, Leigheb F, Decramer M, Panella M; EQCP Study Group. The impact of care pathways for exacerbation of Chronic Obstructive Pulmonary Disease: rationale and design of a cluster randomized controlled trial. *Trials*. 2010 Nov 19;11:111.

27. Puig-Junoy J, Casas A, Font-Planells J, Escarrabill J, Hernández C, Alonso J, Farrero E, Vilagut G, Roca J. The impact of home hospitalization on healthcare costs of exacerbations in COPD patients. *Eur J Health Econ.* 2007 Dec;8(4):325-32.
28. Di Marco F, Verga M, Santus P, Morelli N, Cazzola M, Centanni S. Effect of formoterol, tiotropium, and their combination in patients with acute exacerbation of chronic obstructive pulmonary disease: a pilot study. *Respir Med.* 2006 Nov;100(11):1925-32.
29. Pilcher J, Eastlake L, Richards M, Power S, Cripps T, Bibby S, Braithwaite I, Weatherall M, Beasley R. Physiological effects of titrated oxygen via nasal high-flow cannulae in COPD exacerbations: A randomized controlled cross-over trial. *Respirology.* 2017 Aug;22(6):1149-1155.

### **Wrong study design**

30. Schuetz P, Leuppi JD, Bingisser R, Bodmer M, Briel M, Drescher T, Duerring U, Henzen C, Leibbrandt Y, Maier S, Miedinger D, Mueller B, Scherr A, Schindler C, Stoeckli R, Viatte S, von Garnier C, Tamm M, Rutishauser J. Prospective analysis of adrenal function in patients with acute exacerbations of COPD: the Reduction in the Use of Corticosteroids in Exacerbated COPD (REDUCE) trial. *Eur J Endocrinol.* 2015 Jul;173(1):19-27.
31. Del Sorbo L, Pisani L, Filippini C, Fanelli V, Fasano L, Terragni P, Dell'Amore A, Urbino R, Mascia L, Evangelista A, Antro C, D'Amato R, Sucre MJ, Simonetti U, Persico P, Nava S, Ranieri VM. Extracorporeal Co<sub>2</sub> removal in hypercapnic patients at risk of noninvasive ventilation failure: a matched cohort study with historical control. *Crit Care Med.* 2015 Jan;43(1):120-7.
32. Adams SG, Peters JI. ACP Journal Club. Amoxicillin/clavulanate vs placebo: more exacerbation cures, fewer recurrences in mild-to-moderate COPD. *Ann Intern Med.* 2013 Mar 19;158(6):JC3.



33. Lindenauer PK, Grosso LM, Wang C, Wang Y, Krishnan JA, Lee TA, Au DH, Mularski RA, Bernheim SM, Drye EE. Development, validation, and results of a risk-standardized measure of hospital 30-day mortality for patients with exacerbation of chronic obstructive pulmonary disease. *J Hosp Med.* 2013 Aug;8(8):428-35.
34. Dalal AA, Shah MB, D'Souza AO, Lunacsek OE, Nagar SP, Crater GD. Observational study of the outcomes and costs of initiating maintenance therapies in patients with moderate exacerbations of COPD. *Respir Res.* 2012 May 31;13:41.
35. Marcun R, Sustic A, Brguljan PM, Kadivec S, Farkas J, Kosnik M, Coats AJ, Anker SD, Lainscak M. Cardiac biomarkers predict outcome after hospitalisation for an acute exacerbation of chronic obstructive pulmonary disease. *Int J Cardiol.* 2012 Nov 29;161(3):156-9.
36. Nicolau DP, Sutherland C, Winget D, Baughman RP. Bronchopulmonary pharmacokinetic and pharmacodynamic profiles of levofloxacin 750 mg once daily in adults undergoing treatment for acute exacerbation of chronic bronchitis. *Pulm Pharmacol Ther.* 2012 Feb;25(1):94-8.
37. Bischoff EW, Hamd DH, Sedeno M, Benedetti A, Schermer TR, Bernard S, Maltais F, Bourbeau J. Effects of written action plan adherence on COPD exacerbation recovery. *Thorax.* 2011 Jan;66(1):26-31.
38. Petrillo J, Cairns J. Development of the EXACT-U: a preference-based measure to report COPD exacerbation utilities. *Value Health.* 2011 Jun;14(4):546-54.
39. Anzueto A, Miravittles M. Short-course fluoroquinolone therapy in exacerbations of chronic bronchitis and COPD. *Respir Med.* 2010 Oct;104(10):1396-403. doi: 10.1016/j.rmed.2010.05.018.
40. Glaab T, Vogelmeier C, Buhl R. Outcome measures in chronic obstructive pulmonary disease (COPD): strengths and limitations. *Respir Res.* 2010 Jun 17;11:79.

41. Rothberg MB, Pekow PS, Lahti M, Brody O, Skiest DJ, Lindenauer PK. Comparative effectiveness of macrolides and quinolones for patients hospitalized with acute exacerbations of chronic obstructive pulmonary disease (AECOPD). *J Hosp Med.* 2010 May-Jun;5(5):261-7.
42. Quon BS, Gan WQ, Sin DD. Contemporary management of acute exacerbations of COPD: a systematic review and metaanalysis. *Chest.* 2008 Mar;133(3):756-66.
43. Xiong G, Xu L, Wei L, Li X. Atomization inhalation of terbutaline and budesonide efficiently improved immunity and lung function of AECOPD patients. *Cell Mol Immunol.* 2008 Aug;5(4):287-91.
44. Matthys H, Heger M. EPs 7630-solution--an effective therapeutic option in acute and exacerbating bronchitis. *Phytomedicine.* 2007;14 Suppl 6:65-8. Epub 2006 Dec 20.
45. Mehić B . The role of inhalatory corticosteroids and long acting beta(2) agonists in the treatment of patients admitted to hospital due to acute exacerbations of chronic obstructive pulmonary disease (AECOPD). *Bosn J Basic Med Sci.* 2007 Nov;7(4):352-7.
46. Grossman RF, Ambrusz ME, Fisher AC, Khashab MM, Kahn JB. Levofloxacin 750 mg QD for five days versus amoxicillin/clavulanate 875 mg/125 mg BID for ten days for treatment of acute bacterial exacerbation of chronic bronchitis: a post hoc analysis of data from severely ill patients. *Clin Ther.* 2006 Aug;28(8):1175-80. [Post hoc analysis – trial published prior to 2006].
47. Wilson R, Jones P, Schaberg T, Arvis P, Duprat-Lomon I, Sagnier PP; MOSAIC Study Group. Antibiotic treatment and factors influencing short and long term outcomes of acute exacerbations of chronic bronchitis. *Thorax.* 2006 Apr;61(4):337-42. [Post hoc analysis – trial published prior to 2006].
48. Gaude GS, Nadagouda S. Nebulized corticosteroids in the management of acute exacerbation of COPD. *Lung India.* 2010 Oct;27(4):230-5.

49. Colebourn CL, Barber V, Young JD. Use of helium-oxygen mixture in adult patients presenting with exacerbations of asthma and chronic obstructive pulmonary disease: a systematic review. *Anaesthesia*. 2007 Jan;62(1):34-42.

### **Wrong study population**

50. Cabrini L, Landoni G, Oriani A, Plumari VP, Nobile L, Greco M, Pasin L, Beretta L, Zangrillo A. Noninvasive ventilation and survival in acute care settings: a comprehensive systematic review and metaanalysis of randomized controlled trials. *Crit Care Med*. 2015 Apr;43(4):880-8.

51. Williams JW Jr, Cox CE, Hargett CW, Gilstrap DL, Castillo CE, Govert JA, Lugogo NL, Coeytaux RR, McCrory DC, Hasselblad V, McBroom AJ, Posey R, Gray R, Sanders GD. Noninvasive Positive-Pressure Ventilation (NPPV) for Acute Respiratory Failure [Internet]. Rockville (MD): Agency for Healthcare Research and Quality (US); 2012 Jul. Report No.: 12-EHC089-EF. AHRQ Comparative Effectiveness Reviews.
